# Supplementary material for: Comparison of Wait Times for New Patients Between the Private Sector and United States Department of Veterans Affairs Medical Centers
Source: PubMed Central journal article supplement (PMC6484544; doi:10.1001/jamanetworkopen.2018.7096), 2019-01-18
Supplement: jamanetwopen-2-e187096-s001.pdf [file jamanetwopen-2-e187096-s001.pdf]

## Supplementary Online Content

Penn M, Bhatnagar S, Kuy S, et al. Comparison of wait times for new patients between the private sector and United States Department of Veterans Affairs medical centers. *JAMA Netw Open*. 2019;2(1):e187096. doi:10.1001/jamanetworkopen.2018.7096

**eTable 1.** Mean Wait Times for Private Sector and Veterans Affairs by Region and Specialty in 2014

**eTable 2.** Mean Wait Times for Private Sector and Veterans Affairs by Region and Specialty in 2017

**eTable 3.** Change in Mean Wait Times from 2014 to 2017 for Private Sector and Veterans Affairs Facilities

This supplementary material has been provided by the authors to give readers additional information about their work.

**eTable 1.** Mean Wait Times for Private Sector and Veterans Affairs by Region and Specialty in 2014.

| City                             | Cardiology      |                 | Family Care/Primary Care |    | Dermatology |    | Orthopedics |    | Mean (SD) |         |
|----------------------------------|-----------------|-----------------|--------------------------|----|-------------|----|-------------|----|-----------|---------|
|                                  | PS <sup>1</sup> | VA <sup>2</sup> | PS                       | VA | PS          | VA | PS          | VA | PS        | VS      |
| Atlanta, Georgia                 | 11              | 39              | 24                       | 41 | 14          | 2  | 6           | 33 | 14 (7)    | 29 (16) |
| Boston, Massachusetts            | 27              | 25              | 66                       | 25 | 72          | 16 | 16          | 9  | 45 (24)   | 19 (7)  |
| Dallas, Texas                    | 11              | 19              | 5                        | 23 | 17          | 25 | 8           | 15 | 10 (4)    | 21 (4)  |
| Denver, Colorado                 | 28              | 40              | 16                       | 27 | 37          | 10 | 15          | 27 | 24 (9)    | 26 (11) |
| Detroit, Michigan                | 17              | 23              | 16                       | 16 | 22          | 32 | 18          | 32 | 18 (2)    | 26 (7)  |
| Houston, Texas                   | 11              | 13              | 19                       | 19 | 21          | 19 | 5           | 12 | 14 (6)    | 16 (3)  |
| Los Angeles, California          | 12              | 8               | 20                       | 19 | 14          | 15 | 7           | 19 | 13 (5)    | 15 (4)  |
| Miami, Florida                   | 18              | 16              | 12                       | 26 | 16          | 21 | 9           | 26 | 14 (3)    | 22 (4)  |
| Minneapolis, Minnesota           | 15              | 7               | 10                       | 18 | 56          | 27 | 5           | 29 | 22 (20)   | 20 (9)  |
| New York, New York               | 15              | 11              | 26                       | 14 | 24          | 11 | 9           | 20 | 19 (7)    | 14 (4)  |
| Philadelphia, Pennsylvania       | 6               | 37              | 21                       | 28 | 49          | 12 | 5           | 36 | 20 (18)   | 28 (10) |
| Portland, Oregon                 | 12              | 25              | 13                       | 55 | 27          | 59 | 10          | 30 | 16 (7)    | 42 (15) |
| San Diego, California            | 28              | 17              | 7                        | 14 | 14          | 11 | 18          | 18 | 17 (8)    | 15 (3)  |
| Seattle, Washington              | 9               | 39              | 23                       | 19 | 32          | 23 | 6           | 30 | 18 (11)   | 28 (8)  |
| Washington, District of Columbia | 32              | 18              | 14                       | 19 | 17          | 8  | 11          | 21 | 19 (8)    | 16 (5)  |

<sup>1</sup> Private Sector

<sup>2</sup> Department of Veterans Affairs

eTable 2. Mean Wait Times for Private Sector and Veterans Affairs by Region and Specialty in 2017<sup>12</sup>

| City                             | Cardiology               |                          | Family Care/<br>Primary Care |             | Dermatology |             | Orthopedics |             | Mean (SD)     |               |
|----------------------------------|--------------------------|--------------------------|------------------------------|-------------|-------------|-------------|-------------|-------------|---------------|---------------|
|                                  | PS, <sup>3</sup><br>days | VA, <sup>4</sup><br>days | PS,<br>days                  | VA,<br>days | PS,<br>days | VA,<br>days | PS,<br>days | VA,<br>days | PS, days      | VA, days      |
| <b>Mid-Sized Markets</b>         |                          |                          |                              |             |             |             |             |             |               |               |
| Albany, New York                 | 10                       | 5                        | 122                          | 39          | 46          | 15          | 11          | 8           | 47.25 (45.53) | 16.75 (13.35) |
| Billings, Montana                | 22                       | 7                        | 7                            | 13          | 11          | 7           | 8           | 67          | 12.00 (5.96)  | 23.50 (25.23) |
| Cedar Rapids, Iowa               | 10                       | 21                       | 75                           | 23          | 91          |             | 14          |             | 42.50 (32.50) | 22.00 (1.00)  |
| Dayton, Ohio                     | 21                       | 20                       | 40                           | 21          | 23          | 20          | 12          | 12          | 24.00 (10.12) | 18.25 (3.63)  |
| Evansville, Indiana              | 30                       | 19                       | 76                           | 14          | 43          | 54          | 34          | 16          | 45.75 (18.09) | 25.75 (16.41) |
| Fargo, North Dakota              | 39                       | 19                       | 20                           | 19          | 71          | 29          | 10          | 19          | 35.00 (23.25) | 21.50 (4.33)  |
| Fort Smith, Arkansas             | 48                       | 19                       | 37                           | 16          | 10          | 3           | 23          |             | 31.67 (15.97) | 12.67 (6.94)  |
| Hampton, Virginia                | 16                       | 5                        | 35                           | 15          | 25          | 28          | 13          | 51          | 22.25 (8.58)  | 24.75 (17.21) |
| Hartford, Connecticut            | 40                       | 19                       | 60                           | 48          | 47          | 22          | 15          |             | 49.00 (8.29)  | 29.67 (13.02) |
| Lafayette, Louisiana             | 31                       | 10                       | 10                           | 13          | 38          | 4           | 11          |             | 26.33 (11.90) | 9.00 (3.74)   |
| Manchester, New Hampshire        | 46                       |                          | 72                           |             | 33          | 15          | 14          | 23          | 23.50 (9.50)  | 19.00 (4.00)  |
| Odessa, Texas                    | 63                       |                          | 24                           | 12          | 6           |             | 17          |             | 24.00 (0)     | 12.00 (0)     |
| Savannah, Georgia                | 36                       |                          | 61                           | 23          | 26          | 6           | 14          |             | 43.50 (17.50) | 14.50 (8.50)  |
| Temecula, California             | 55                       |                          | 22                           | 9           | 25          | 4           | 13          | 8           | 20.00 (5.10)  | 7.00 (2.16)   |
| Yakima, Washington               | 18                       |                          | 153                          | 18          | 31          | 2           | 16          |             | 92.00 (61.00) | 10.00 (8.00)  |
| <b>Large Markets</b>             |                          |                          |                              |             |             |             |             |             |               |               |
| Atlanta, Georgia                 | 16                       | 42                       | 27                           | 18          | 13          | 3           | 7           | 19          | 15.75 (7.26)  | 20.31 (14.04) |
| Boston, Massachusetts            | 45                       |                          | 109                          | 27          | 52          | 11          | 11          | 19          | 57.33 (40.19) | 19.07 (6.45)  |
| Dallas, Texas                    | 12                       | 11                       | 12                           | 16          | 22          | 27          | 10          | 11          | 14.00 (4.69)  | 16.20 (6.45)  |
| Denver, Colorado                 | 22                       | 14                       | 27                           | 19          | 51          | 7           | 10          | 33          | 27.50 (14.91) | 18.26 (9.51)  |
| Detroit, Michigan                | 14                       | 17                       | 27                           | 13          | 27          | 32          | 19          | 16          | 21.75 (5.54)  | 19.50 (7.37)  |
| Houston, Texas                   | 12                       | 14                       | 21                           | 12          | 28          | 11          | 10          | 14          | 17.75 (7.22)  | 12.82 (1.37)  |
| Los Angeles, California          | 20                       | 2                        | 42                           | 10          | 35          | 23          | 12          | 19          | 27.25 (11.86) | 13.27 (8.08)  |
| Miami, Florida                   | 14                       |                          | 28                           | 44          | 11          | 9           | 12          | 17          | 17.00 (7.79)  | 23.27 (15.03) |
| Minneapolis, Minnesota           | 22                       | 15                       | 8                            | 13          | 30          | 37          | 15          | 18          | 18.75 (8.17)  | 20.75 (9.55)  |
| New York, New York               | 15                       | 11                       | 26                           | 39          | 15          | 12          | 10          | 25          | 16.50 (5.85)  | 21.73 (11.51) |
| Philadelphia, Pennsylvania       | 28                       | 59                       | 17                           | 26          | 78          | 9           | 10          | 19          | 33.25 (26.62) | 28.14 (18.87) |
| Portland, Oregon                 | 32                       | 6                        | 39                           | 13          | 30          | 8           | 11          | 13          | 28.00 (10.37) | 10.08 (3.03)  |
| San Diego, California            | 30                       | 3                        | 13                           | 8           | 30          | 20          | 19          | 16          | 23.00 (7.31)  | 11.83 (6.70)  |
| Seattle, Washington              | 16                       | 5                        | 26                           | 13          | 42          | 16          | 7           | 11          | 22.75 (12.99) | 11.25 (4.02)  |
| Washington, District of Columbia | 18                       | 10                       | 17                           | 27          | 20          | 4           | 8           | 27          | 15.75 (4.60)  | 17.02 (10.20) |

<sup>1</sup> Averages are calculated using a region/specialty's data only if it is present in both Private Sector and Veterans Affairs samples.

<sup>2</sup> Some data is missing due to lack of reporting at the specific VA facilities.

<sup>3</sup> Private Sector

<sup>4</sup> Department of Veterans Affairs

**eTable 3.** Change in Mean Wait Times from 2014 to 2017 for Private Sector and Veterans Affairs Facilities.

| City                             | Overall Change between 2014 and 2017                   |                                                          |
|----------------------------------|--------------------------------------------------------|----------------------------------------------------------|
|                                  | Private Sector, wait time change (days 2017-days 2014) | Veterans Affairs, wait time change (days 2017-days 2014) |
| Atlanta, Georgia                 | 2.0                                                    | -8.4                                                     |
| Boston, Massachusetts            | 9.0                                                    | 0.4                                                      |
| Dallas, Texas                    | 3.8                                                    | -4.4                                                     |
| Denver, Colorado                 | 3.5                                                    | -7.9                                                     |
| Detroit, Michigan                | 3.5                                                    | -6.0                                                     |
| Houston, Texas                   | 3.8                                                    | -3.1                                                     |
| Los Angeles, California          | 14.0                                                   | -2.0                                                     |
| Miami, Florida                   | 2.5                                                    | 1.1                                                      |
| Minneapolis, Minnesota           | -2.8                                                   | 0.5                                                      |
| New York, New York               | -2.0                                                   | 8.0                                                      |
| Philadelphia, Pennsylvania       | 13.0                                                   | -0.1                                                     |
| Portland, Oregon                 | 12.5                                                   | -32.3                                                    |
| San Diego, California            | 6.3                                                    | -3.4                                                     |
| Seattle, Washington              | 5.3                                                    | -16.5                                                    |
| Washington, District of Columbia | -2.8                                                   | 0.7                                                      |
| <b>Mean (SD)</b>                 | <b>4.8 (5.2)</b>                                       | <b>-4.9 (9.1)</b>                                        |
